# Supplementary material
Source: MDPI journal article supplement (https://www.mdpi.com/2073-4395/12/11/2660)
Supplement: s1 [file s1]

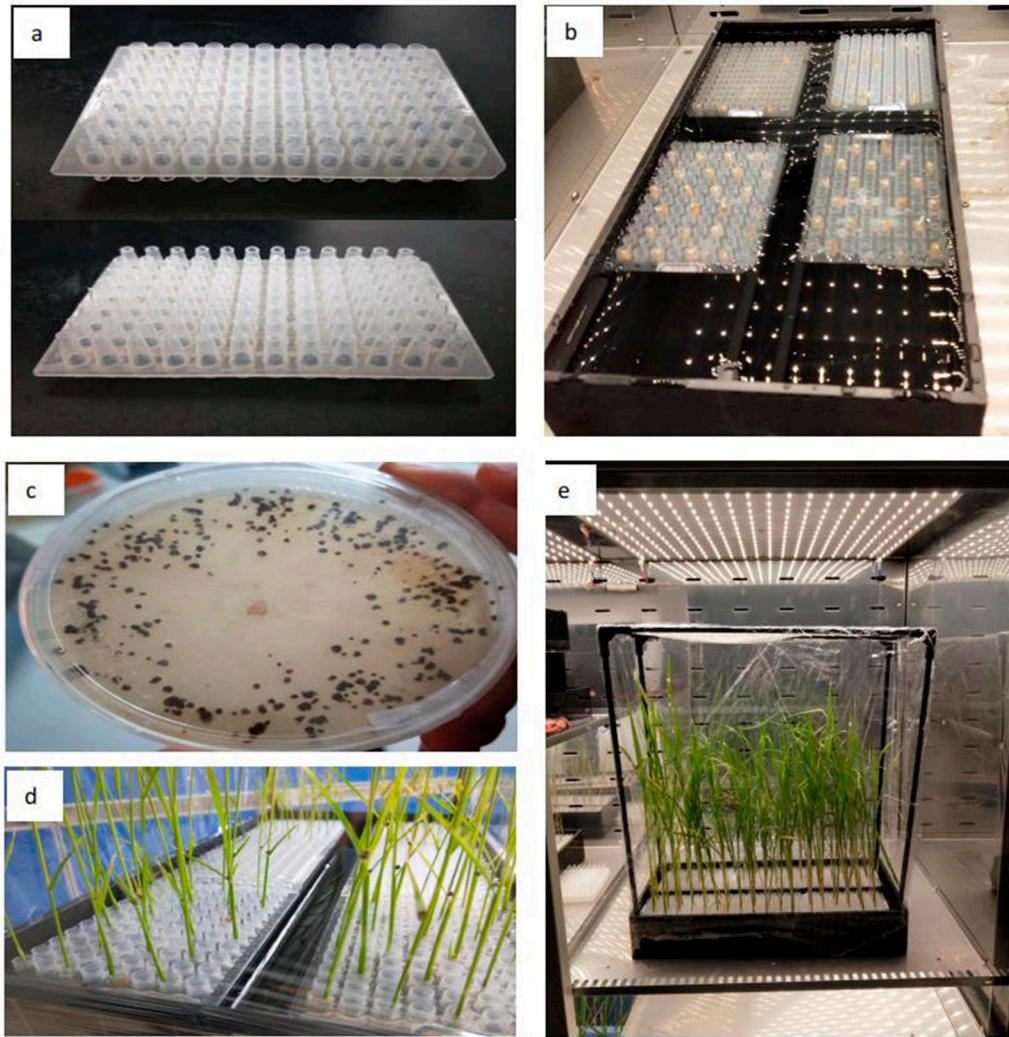

**Figure S1.** A schematic diagram of the operation process of inoculation with *Rhizoctonia solani* sclerotinia. a. Cutting holes at the bottom of the 96-well plate; b. Hydroponics after rice seeds sowing; c. The culture of *R. solani* sclerotinia; d. Inoculation of *R. solani* sclerotinia; e. Covered with plastic wraps to keep high relative humidity.

**Table A1.** Primer information for qRT-PCR assay.

| Gene ID      | Gene Name | Primer Name       | Primer Sequence        |
|--------------|-----------|-------------------|------------------------|
| Os05g0427400 | OsPAL7    | <i>q-PAL7-F</i>   | ATCGACATCCTCAAGCTCATG  |
|              |           | <i>q-PAL7-R</i>   | AGTTGGTGCTCAGCGTCTTCT  |
| Os08g0508800 | OsHI-LOX  | <i>q-HI-LOX-F</i> | CAAAGCCAACCCAAGCCAAG   |
|              |           | <i>q-HI-LOX-R</i> | ATGGATTGAGCTGAGGACGC   |
| Os02g0194700 | OsLOX1    | <i>q-LOX1-F</i>   | AGGAGAAGGAGACGGTGAG    |
|              |           | <i>q-LOX1-R</i>   | GATCTCCTTGACGAACATCTCG |
| Os12g0569500 | OsOSM1    | <i>q-OSM1-F</i>   | CCGACAACCTAGCTAGCCTA   |
|              |           | <i>q-OSM1-R</i>   | CGCACGTACAAACATAAGG    |
| Os03g0225900 | OsAOS2    | <i>q-AOS2-F</i>   | TGCCACAACCTGCTGTTCGC   |
|              |           | <i>q-AOS2-R</i>   | TGGTAGCCGAACAGCATCTC   |
| Os02g0580300 | OsGF14e   | <i>q-GF14e-F</i>  | GATATTGCCCTGGCAGAGTTG  |
|              |           | <i>q-GF14e-R</i>  | GAGATATCGGAAGTCCACAGC  |

|                     |                                |                   |                          |
|---------------------|--------------------------------|-------------------|--------------------------|
| <i>Os12g0175400</i> | <i>Osmyb2</i>                  | <i>q-myb2-F</i>   | GGGCTGAAACGCACAGGCAAGA   |
|                     |                                | <i>q-myb2-R</i>   | CTGCTTGGCGTGCTTCTGC      |
| <i>Os04g0398000</i> | <i>OsRap2.6</i>                | <i>q-Rap2.6-F</i> | CAGCAGGCTTCTTCCTTCTACC   |
|                     |                                | <i>q-Rap2.6-R</i> | CTTCTTCGGGTCCCTTATCTCC   |
| <i>Os11g0490900</i> | <i>OsWRKY72</i>                | <i>q-WRKY72-F</i> | CAAGGGTGCAACGTGAAGAA     |
|                     |                                | <i>q-WRKY72-R</i> | ATTTCTCGATGGGGTGCGTG     |
| <i>Os03g0693900</i> | <i>OsOXO3</i>                  | <i>q-OXO3-F</i>   | TGTCCTTCAACAGCCAGAAC     |
|                     |                                | <i>q-OXO3-R</i>   | TCAACTACACCAGCATCCAC     |
| <i>Os03g0234200</i> | <i>Ubq</i> (reference<br>gene) | <i>q-UBQ-F</i>    | AACCAGCTGAGGCCCAAGA      |
|                     |                                | <i>q-UBQ-R</i>    | ACGATTGATTAAACCAGTCCATGA |

---
